# Supplementary material for: Adsorption of nitrate from water by quaternized chitosan wrinkled microspheres@MgFe-LDH core–shell composite
Source: Royal Society of Chemistry journal article supplement (doi:10.1039/d2nj01902g), 2022-01-01
Supplement: d2nj01902g1.pdf [file d2nj01902g1.pdf]

1  
2  
3  
4  
5  
6  
7  
8  
9  
10

## Support Information

### Adsorption of nitrate from water by quaternized chitosan wrinkled microspheres@MgFe-LDHs core-shell composite

Jumeng Bian <sup>a</sup>, Qi Zhu <sup>a,\*</sup>, Aiwen Wang <sup>b</sup>, Yue Sun <sup>a</sup>, Kai Pang <sup>a</sup>, Xiao Li <sup>a</sup>, Ze  
Lang <sup>a</sup>

<sup>a</sup> School of Chemistry and Materials Science, Heilongjiang University, Harbin  
150080, China

<sup>b</sup> School of Environment, Harbin Institute of Technology, Harbin, 150090, China

\*Corresponding author. Email: [hdzhuqi@126.com](mailto:hdzhuqi@126.com)

## 11 **1. Preparation of materials and characterization**

### 12 **1.1. Preparation of GCS**

13 First, 250 ml liquid paraffin was added into a 500 ml round bottom flask, and a  
14 certain amount of Span80 was added. Then, 25 ml chitosan acetic acid solution (1 g  
15 chitosan was dissolved in 3% (V/V) acetic acid solution, and the suspension was  
16 uniformly dispersed by ultrasound) was added slowly at 500 rpm and kept in a constant  
17 temperature water bath at 50°C for 3 h. After that, 0.8 ml glutaraldehyde was added  
18 slowly and water bath was continued for 4 h. The liquid in the round bottom flask was  
19 centrifugally washed three times with petroleum ether and isopropanol, and dried in an  
20 oven at 60°C, GCS was successfully synthesized.

### 21 **1.2. Preparation of GCS@CTA**

22 0.4 g GCS and 10 ml isopropanol were added to the three-necked flask, then heated  
23 to 50°C with stirring, swelled for 1 h, slowly added dropwise with 2 mL of CTA, and  
24 then reacted at 70°C for 7 h. Finally, the liquid in the three-necked flask was centrifuged  
25 and washed three times with methanol and ethanol and dried in an oven to obtain the  
26 GCS@CTA.

### 27 **1.3. Preparation of MgFe-Cl-LDHs**

28  $\text{MgCl}_2 \cdot 6\text{H}_2\text{O}$  and  $\text{FeCl}_3 \cdot 6\text{H}_2\text{O}$  were added into 50 mL deionized water, and the  
29 mixed metal salt solution of  $0.06 \text{ mol L}^{-1}$  was prepared with the molar ratio of  $[\text{Mg}^{2+}]/$   
30  $[\text{Fe}^{3+}]$  of 2:1, 3:1, 4:1, respectively. Then added  $1 \text{ mol L}^{-1}$  NaOH solution under  
31 vigorous stirring to ensure that the pH value of the solution was between 9-10. Then  
32 the solution was transferred to a stainless steel autoclave and put in the oven at 120°C  
33 for 12 h. Finally, deionized water and ethanol were used for centrifugal washing until  
34 the solution was neutral, and the products were dried in an oven to obtain 2 MgFe-Cl-  
35 LDHs, 3 MgFe-Cl-LDHs, and 4 MgFe-Cl-LDHs, respectively.

### 36 **1.4. Preparation of GCS@CTA @MgFe-LDHs**

37 Add 0.2 g of GCS@CTA to 15 mL of deionized water and stir for 30 min obtained  
38 solution A. Solution B was obtained by adding 0.4879 g of  $\text{MgCl}_2 \cdot 6\text{H}_2\text{O}$  and 0.1622 g  
39 of  $\text{FeCl}_3 \cdot 6\text{H}_2\text{O}$  to 50 mL of deionized water. Subsequently, solution B was added  
40 dropwise to solution A with constant stirring, and 1 mol/L NaOH was used to ensure

41 the pH value was between 9-10. The mixed solution was transferred to a stainless steel  
42 autoclave and reacted in an oven at 120 °C for 12 h. Finally, deionized water and  
43 ethanol were used for centrifugal washing until the solution was neutral, and the product  
44 was dried in a 60 °C oven to obtain the GCS@CTA@MgFe-LDHs.

#### 45 **1.5. Characterization**

46 The crystallographic of samples were measured by X-ray diffraction (XRD-D8  
47 Advance, Bruker, Cu K $\alpha$  radiation  $\lambda=1.5406$  nm). FT-IR spectroscopy (Spectorn One,  
48 Perkin Elmer) was selected to verify the samples. Micromorphological of samples were  
49 characterized by scanning electron microscopy (Hitachi S-4800). The Brunauer-  
50 Emmett-Teller (BET) surface areas of the samples were measured by N<sub>2</sub> adsorption on  
51 AUTOSORB-1, and the plot of the pore diameter distribution was measured by Barrett-  
52 Joyner-Halenda (BJH) method. The elemental composition of samples were measured  
53 by X-ray photoelectron spectroscopy (XPS). The zeta potential was measured by Zeta  
54 Sizer Nano-ZS system (Malvern, United Kingdom).

55

56 Table S1. Comparison of maximum nitrate adsorption capacities ( $q_m$ , mg g<sup>-1</sup>) by  
 57 different adsorbents reported in prior literatures.

| Adsorbents                                                            | Dosage  | pH   | $q_m$<br>(mg/g) | References |
|-----------------------------------------------------------------------|---------|------|-----------------|------------|
| Polypyrrole-modified plastic-carbon                                   | 15 g/L  | 2-11 | 45.18           | [1]        |
| ZnCl <sub>2</sub> -AC                                                 | 20 g/L  | 4    | 5.53            | [2]        |
| Carboxymethyl $\beta$ -cyclodextrin immobilized on hydrated lanthanum | 0.5 g/L | 3-11 | 37.50           | [3]        |
| La <sub>2</sub> O <sub>3</sub> AM@CS composite beads                  | 2 g/L   | 3-11 | 27.84           | [4]        |
| Zr/quaternary ammonium powder with polyvinylidene fluoride            | --      | --   | 9.66            | [5]        |
| Zr cross-linked chitosan assisted bentonite                           | 2 g/L   | 3-11 | 23.89           | [6]        |
| modified cellulose from Corn stalks                                   | 0.1 g   | 6.8  | 13.61           | [7]        |
| Chitosan grafted quaternized resin                                    | 2 g/L   | 2-11 | 34.5            | [8]        |
| GCS@CTA@MgFe-LDHs                                                     | 0.4 g/L | 4-11 | 71.5            | This study |

58

59

60

61 Table S2. Concentrations of  $\text{Mg}^{2+}$  and  $\text{Fe}^{3+}$  leached from GCS@CTA@MgFe-LDHs

62 extracted solution at pH 4

| Sample            | $\text{Mg}^{2+}$<br>( $\text{mg L}^{-1}$ ) | $\text{Fe}^{3+}$<br>( $\text{mg L}^{-1}$ ) | pH<br>( $T = 298\text{K}$ ) |
|-------------------|--------------------------------------------|--------------------------------------------|-----------------------------|
| GCS@CTA@MgFe-LDHs | 0.128                                      | 0.073                                      | $4 \pm 0.5$                 |

63

64

65

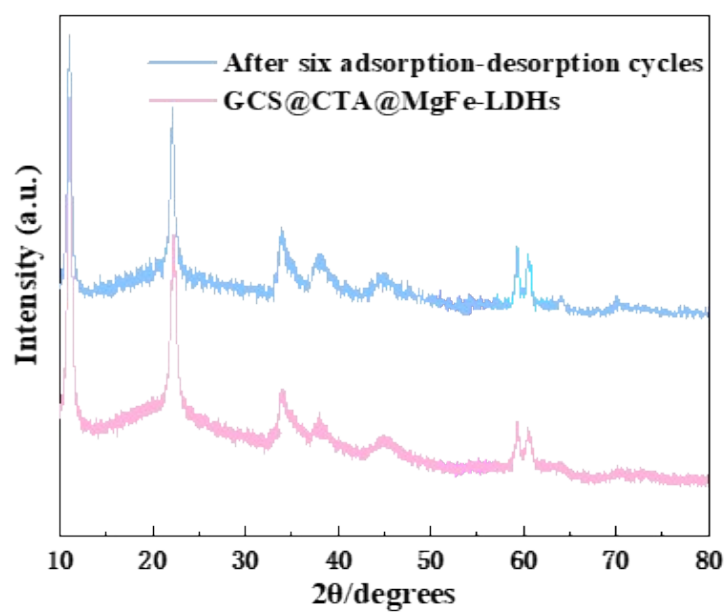

66

67 Fig.S1 The XRD of GCS@CTA@MgFe-LDHs before and after six adsorption-  
68 desorption cycles

69

70

- 71 [1] Wu K, Li Y, Liu T, et al. The simultaneous adsorption of nitrate and phosphate by  
72 an organic-modified aluminum-manganese bimetal oxide: Adsorption properties and  
73 mechanisms[J]. Applied Surface Science, 2019, 478: 539-551.
- 74 [2] Nassar H, Zyoud A, El-Hamouz A, et al. Aqueous nitrate ion adsorption/desorption  
75 by olive solid waste-based carbon activated using ZnCl<sub>2</sub>[J]. Sustainable Chemistry and  
76 Pharmacy, 2020, 18: 100335.
- 77 [3] Teng Y, Song G, Chen R, et al. Carboxymethyl  $\beta$ -cyclodextrin immobilized on  
78 hydrated lanthanum oxide for simultaneous adsorption of nitrate and phosphate[J].  
79 Journal of the Taiwan Institute of Chemical Engineers, 2022, 132: 104153.
- 80 [4] Kumar I A, Jeyaprabha C, Meenakshi S, et al. Hydrothermal encapsulation of  
81 lanthanum oxide derived Aegle marmelos admixed chitosan bead system for nitrate and  
82 phosphate retention[J]. International Journal of Biological Macromolecules, 2019, 130:  
83 527-535.
- 84 [5] Gao Q, Wang C-Z, Liu S, et al. Ultrafiltration membrane microreactor (MMR) for  
85 simultaneous removal of nitrate and phosphate from water[J]. Chemical Engineering  
86 Journal, 2019, 355: 238-246.
- 87 [6] Kumar I A, Jeyaprabha C, Viswanathan N. Effect of polyvalent metal ions encrusted  
88 biopolymeric hybrid beads on nitrate adsorption[J]. Journal of Environmental Chemical  
89 Engineering, 2020, 8(4): 103894.
- 90 [7] Fan C, Zhang Y. Adsorption isotherms, kinetics and thermodynamics of nitrate and  
91 phosphate in binary systems on a novel adsorbent derived from corn stalks[J]. Journal  
92 of Geochemical Exploration, 2018, 188: 95-100.
- 93 [8] Banu H T, Meenakshi S. One pot synthesis of chitosan grafted quaternized resin for  
94 the removal of nitrate and phosphate from aqueous solution[J]. International Journal of  
95 Biological Macromolecules, 2017, 104: 1517-1527.

96
